## **Developmental Genetics of Color Pattern Establishment in Cats**

Christopher B. Kaelin<sup>1</sup>, Kelly A. McGowan<sup>1</sup>, Gregory S. Barsh\*

HudsonAlpha Institute for Biotechnology, Huntsville, AL 35806. Department of Genetics, Stanford University School of Medicine, Stanford, CA 94305.

<sup>1</sup>These authors contributed equally.

\*To whom correspondence should be addressed:

Greg Barsh  
HudsonAlpha Institute for Biotechnology  
601 Genome Way  
Huntsville, Alabama 35806  
gbarsh@hudsonalpha.org

## 1 **Abstract**

2 Intricate color patterns are a defining aspect of morphological diversity in the Felidae. We applied  
3 morphological and single-cell gene expression analysis to fetal skin of domestic cats to identify when,  
4 where, and how, during fetal development, felid color patterns are established. Early in development,  
5 we identify stripe-like alterations in epidermal thickness preceded by a gene expression pre-pattern.  
6 The secreted Wnt inhibitor encoded by Dickkopf 4 (*Dkk4*) plays a central role in this process, and is  
7 mutated in cats with the Ticked pattern type. Our results bring molecular understanding to how the  
8 leopard got its spots, suggest that similar mechanisms underlie periodic color pattern and periodic hair  
9 follicle spacing, and identify new targets for diverse pattern variation in other mammals.

## 10 **Main**

11 Understanding the basis of animal color pattern is a question of longstanding interest for developmental  
12 and evolutionary biology. In mammals, markings such as cheetah spots and tiger stripes helped  
13 motivate theoretical models, such as the Turing reaction-diffusion mechanism, that have the potential to  
14 explain how periodic and stable differences in gene expression and form might arise from a uniform  
15 field of identical cells<sup>1-4</sup>. Reaction-diffusion and other mechanisms to account for periodic morphological  
16 structures have been implicated in diverse developmental processes in laboratory animals<sup>5-12</sup>, but  
17 much less is known about mammalian color patterns, largely because the most prominent examples  
18 occur in natural populations of wild equids and felids that are not suitable for genetic or experimental  
19 investigation.

20 In fish, color patterns involve direct interactions between pigment cells that are often dynamic, allowing  
21 additional pattern elements to appear during growth or regeneration<sup>13-15</sup>. By contrast, in mammalian  
22 skin and hair, melanocytes are uniformly distributed during development, and the amount and type of  
23 melanin produced is controlled later by paracrine signaling molecules within individual hair follicles<sup>16-18</sup>.  
24 Additionally, pattern element identity of an individual hair follicle, e.g. as giving rise to light- or dark-  
25 colored hair, is maintained throughout hair cycling and cell division, so that individual spots or stripes of  
26 hair apparent at birth enlarge proportionally during postnatal growth. Thus, periodic mammalian color  
27 patterns may be conceptualized as arising from a three-stage process: (1) Establishment of pattern  
28 element identity during fetal development; (2) Implementation of pattern morphology by paracrine  
29 signaling molecules produced within individual hair follicles; and (3) Maintenance of pattern element  
30 identity during hair cycling and organismal growth<sup>17,19</sup>.

31 Domestic cats are a useful model to study color patterns due to their accessibility, the genetic and  
32 genomic infrastructure, the opportunity for genomic and histological studies of tissue samples, and the  
33 diversity of pattern types<sup>19-21</sup>. The archetypal tabby pattern—regularly spaced dark markings on an  
34 otherwise light background—varies considerably in both form and color, and many of those varieties

35 are similar to some wild felid species. In previous studies of domestic cats, we showed that *Endothelin*  
36 3 is expressed at the base of hair follicles in tabby markings, causes a darkening of the overlying hairs  
37 by increasing the production of black-brown eumelanin relative to red-yellow pheomelanin, and  
38 therefore plays a key role in implementation of tabby pattern<sup>17</sup>. However, tabby markings are apparent  
39 in developing hair follicles<sup>17</sup>, indicating that establishment of color pattern must occur at or before hair  
40 follicle development.

41 Here, we apply single cell gene expression analysis to fetal cat skin to investigate the developmental,  
42 molecular, and genomic basis of pattern establishment. We uncover a new aspect of epidermal  
43 development that signifies the establishment of pattern element identity and characterize signaling  
44 molecules and pathways associated with pattern establishment. We show that one of those signaling  
45 molecules encoded by *Dickkopf 4 (Dkk4)* underlies a naturally occurring mutation that affects tabby  
46 pattern and plays a key role in the patterning process. Our work provides fundamental insight into the  
47 mechanisms of color pattern establishment as well as a platform for exploring the biology of periodic  
48 patterns more broadly.

## 49 **Results**

### 50 Patterns of epidermal morphology in developing cat skin

51 Trap-neuter-release programs have become a popular means of controlling feral cat overpopulation<sup>22</sup>.  
52 During breeding season, approximately half of all female feral cats are pregnant, and tissue from non-  
53 viable embryos can be recovered during spaying without compromising animal health or interfering with  
54 efforts to control feral cat overpopulation. We collected more than two hundred prenatal litters from feral  
55 cat, spay-neuter clinics across a range of developmental stages classified according to previous work  
56 on cats<sup>23</sup> and laboratory mice<sup>24</sup> (Supplementary Table 1).

57 Histochemical and morphometric analysis revealed a previously unknown aspect of epidermal  
58 development. At stage 13 (analogous to mouse embryonic day 11, E11), fetal skin is comprised of a  
59 uniform monolayer of epithelial cells that covers a pauci-cellular dermis (Fig. 1a). Approximately 16  
60 days later at stage 16 (analogous to mouse E15), before epidermal differentiation and hair follicle  
61 morphogenesis, we noticed that the epidermis is organized into alternating regions that are either  
62 “thick” or “thin” (Fig. 1a, stage 16). Characterization of keratin expression and cell proliferation indicate  
63 that the thick and thin regions are fundamentally different from epidermal stratification that normally  
64 occurs later in development (Fig. 1b, 1c, Supplementary Note 1, Supplementary Table 1).

65 By stage 22 (analogous to postnatal day 4-6 in laboratory mice), well-developed hair follicles are  
66 present that can be categorized according to the type of melanin produced (Fig. 1a), and that give rise  
67 to tabby pattern: dark markings contain mostly eumelanin, while the light areas contain mostly  
68 pheomelanin.

69 To investigate if epidermal thickening at stage 16 might be related to tabby patterns that appear later,  
70 we made use of natural genetic variation in *Transmembrane aminopeptidase Q*, (*Taqpep*). We showed  
71 previously that loss-of-function mutations in *Taqpep* cause the ancestral pattern of dark narrow stripes  
72 (*Ta<sup>M</sup>/-*, Mackerel) to expand into less well-organized large whorls (*Ta<sup>b</sup>/Ta<sup>b</sup>*, Blotched) (Fig. 1d)<sup>17</sup>. *Ta<sup>b</sup>*  
73 alleles are common in most feral cat populations<sup>25</sup>, and we asked if the topology of stage 16 epidermal  
74 thickening is influenced by *Taqpep* genotype. Two-dimensional maps assembled from 100  $\mu$ M serial  
75 sections of embryos of different genotype reveal that thick epidermal regions from *Ta<sup>M</sup>/Ta<sup>M</sup>* embryos are  
76 organized into vertically oriented columns (black bars, Fig. 1d) separated by larger thin epidermal  
77 regions (yellow bars, Fig. 1d). By contrast, in *Ta<sup>b</sup>/Ta<sup>b</sup>* embryos, the thick epidermal regions in the flank  
78 are broadened. A similar observation applies to epidermal topology and tabby patterns in the dorsal  
79 neck (Fig. 1d, Supplementary Fig. 1, Supplementary Note 1). Thus, embryonic epidermal topologies  
80 resemble tabby patterns in adult animals of the corresponding genotype, providing a morphologic  
81 signature of color pattern establishment before melanocytes enter the epidermis and before  
82 development of hair follicles. As described below, an associated molecular signature further refines the  
83 process to a 4-day window that spans stages 15 and 16, and delineates developmental substages  
84 (Supplementary Table 1) that track color pattern establishment more precisely.

#### 85 Single cell gene expression analysis of developing fetal skin

86 We hypothesized that the alternating thick and thin regions in fetal epidermis might arise from an earlier  
87 molecular pre-pattern. To explore this idea, we dissociated fetal cat skin, enriched for basal  
88 keratinocytes, and generated single-cell 3' RNAseq (scRNAseq, 10x Genomics) libraries.

89 Among libraries that we sequenced and analyzed, 3 were from developmental stages (15a, 15b, 16a,  
90 Supplementary Table 1) occurring prior to or during the appearance of epidermal thickening. Uniform  
91 Manifold Approximation and Projection (UMAP) dimensionality reduction<sup>26</sup> delineates different fetal skin  
92 cell populations as distinct cell clusters (Fig. 2a, Supplementary Table 3), but basal keratinocytes,  
93 identified by *Krt5* expression<sup>27</sup>, are the predominant cell type at all three stages (Supplementary Table  
94 4, Supplementary Note 2). At stage 16a, unsupervised *k*-means clustering (*k*=9) is able to distinguish  
95 two subpopulations of basal keratinocytes based on differential expression of 604 genes (FDR<0.05),  
96 including the secreted inhibitors of Wnt signaling encoded by *Dickkopf 4* (*Dkk4*,  $p=6.50e-46$ , negative  
97 binomial exact test) and *Wingless Inhibitory Factor 1* (*Wif1*,  $p=5.81e-50$ , negative binomial exact test)  
98 (Supplementary Table 5). *Dkk4* and *Wif1* exhibit a similar extent of differential expression, 18-fold and  
99 28-fold, respectively, but in the cells in which those genes are upregulated, the absolute levels of *Dkk4*  
100 are much higher than that of *Wif1*, 36 transcripts per cell compared to 2.2 transcripts per cell  
101 (Supplementary Table 5).

102 Unsupervised clustering did not resolve different populations of basal keratinocytes at earlier stages,  
103 but a supervised approach based on differential expression of *Dkk4* (upper and middle panels, Fig. 2b,

104 Supplementary Note 2) indicates that the same population apparent at stage 16a can also be  
105 recognized at stage 15a and 15b. As with stage 16a, the absolute levels of *Dkk4* expression are the  
106 highest of the differentially expressed genes, 22.3 and 99.2 transcripts per cell at stages 15a and 15b,  
107 respectively (Fig. 3c, Supplementary Table 5).

108 These observations on *Dkk4* in the scRNAseq data were confirmed and extended by *in situ*  
109 hybridization to fetal skin sections, and reveal that *Dkk4* is expressed in alternating subsets of basal  
110 keratinocytes at stage 15b, eventually marking the thick epidermal regions that are histologically  
111 apparent by stage 16a (Fig. 2c). Between stage 16a and 17, average size of the *Dkk4* expression  
112 domain becomes gradually smaller until it is only apparent in epidermal cells comprising the developing  
113 hair germ (Supplementary Fig. 2a, 2b, Supplementary Note 1).

114 As with the topology of epidermal thickening, we assessed the effect of *Taqpep* genotype on the  
115 pattern of *Dkk4* expression at stage 16, and observed a similar outcome: regions of *Dkk4* expression  
116 are fewer and broadened in *Ta<sup>b</sup>/Ta<sup>b</sup>* embryos compared to *Ta<sup>M</sup>/Ta<sup>M</sup>* embryos (Fig. 2d). Qualitatively, the  
117 effect is strikingly apparent from whole mount *in situ* hybridization (Fig. 2e, Supplementary Fig. 2c).  
118 These embryonic expression differences foreshadow the difference in adult color patterns between  
119 *Ta<sup>M</sup>/-* and *Ta<sup>b</sup>/Ta<sup>b</sup>* animals. Thus, expression of *Dkk4* represents a dynamic molecular pre-pattern in  
120 developing skin that precedes and is coupled to the topology of epidermal thickening.

121 Examining the changes in basal keratinocyte gene expression more closely reveals an underlying  
122 transcriptional network that involves Wnt signaling (Fig. 3c, Supplementary Table 5). There are 927,  
123 761, and 507 genes whose expression level changes >2-fold at stages 15a, 15b, and 16a, respectively,  
124 of which 121 upregulated and 63 downregulated genes are in common across all stages (Fig. 3a, 3b).  
125 Although the Wnt inhibitor encoded by *Dkk4* is the most highly expressed gene as noted earlier, other  
126 upregulated genes include *Atp6v1c2*, *Lgr6*, *Lrp4*, *Fzd10*, and *Lef1*, which represent a signature for  
127 increased responsiveness to Wnt signaling (Fig. 3c)<sup>28,29</sup>. At stages 15b and 16a, additional upregulated  
128 genes include *Wnt10b*, *Wnt5a*, *Ctnnb1*, and *Dkk3*. Overall, these patterns of gene expression suggest  
129 a reaction-diffusion model for establishment of color pattern in which *Dkk4*, *Dkk3*, and *Wif1* serve as  
130 long-range inhibitors, and *Wnt10b* and *Wnt5a* serve as short-range activators (Fig. 3d).

131 In laboratory mice, a Wnt—Dkk reaction diffusion system has been suggested previously to underlie  
132 periodic hair follicle spacing, based on patterns of gene expression and gain-of-function transgenic  
133 experiments<sup>12,30</sup>. In fetal cat skin, epidermal expression domains of *Dkk4* are much broader and appear  
134 earlier than those associated with hair follicle placode spacing (Supplementary Fig. 2a, 2b), although by  
135 stage 17, expression of *Dkk4* in cats is similar to expression of *Dkk4* in mice.

136 We compared genes that were differentially expressed in basal keratinocyte subpopulations during  
137 color pattern establishment in cats with those that are differentially expressed between hair follicle

138 placodes and interfollicular epidermis in mice, based on a previously established 262 gene signature for  
139 primary hair follicle placodes<sup>28</sup>. Of the 121 genes that we identified as a signature for color pattern  
140 establishment in *Dkk4*-positive basal keratinocytes, 26 (21.5%) were shared with the primary hair  
141 follicle placode signature (Supplementary Table 5). Thus, the gene expression pre-pattern for color  
142 pattern establishment occurs prior to and foreshadows an overlapping pattern in hair follicle placodes.

#### 143 A *Dkk4* mutation in domestic cats

144 The mackerel stripe pattern represents the ancestral state; in addition to the blotched pattern caused by  
145 *Taqpep* mutations (Fig. 1d), several additional pattern types are recognized in domestic cats for which  
146 the genetic basis is uncertain. For example, periodic dark spots as seen in the Egyptian Mau or Ocicat  
147 breeds (Fig. 4a) are only observed in *Ta<sup>M</sup>/-* animals<sup>19,31</sup>, but the genetic basis of Mackerel vs. Spotting  
148 is not known. Another locus, *Ticked*, named for its ability to prevent dark tabby markings and thereby  
149 showcase hair banding patterns across the entire body surface, has been selected for in breeds with a  
150 uniform appearance such as the Abyssinian, Burmese, or Singapura (Fig. 4a)<sup>32</sup>. However, *Ticked* is  
151 also thought to be responsible for the so-called “servaline” pattern of spotted Savannah cats (Fig. 4d),  
152 in which large dark spots are reduced in size and increased in number. *Ticked* was originally thought to  
153 be part of an allelic series that included *Ta<sup>M</sup>* and *Ta<sup>b</sup>*<sup>33</sup>, but was subsequently mapped to an  
154 independent locus on chrB1, and recognized as a semidominant derivative allele, *Ti<sup>A</sup>*, obscuring tabby  
155 markings except on the legs and the tail when heterozygous, and eliminating tabby markings when  
156 homozygous<sup>19,34</sup>.

157 *Ticked* maps to a region of low recombination close to the centromere, and has therefore been difficult  
158 to identify by linkage analysis. Furthermore, we observed that some cats thought to be homozygous for  
159 *Ticked*, including Cinnamon, the source of the feline reference sequence, carried two haplotypes  
160 across the linkage region, suggesting the existence of multiple *Ti<sup>A</sup>* mutations. We hypothesized that one  
161 or more of the genes that was differentially expressed between basal keratinocyte subpopulations  
162 might represent *Ticked*, and asked whether any differentially expressed gene satisfied two additional  
163 criteria: (1) a genetic map position close to or coincident with *Ticked*; and (2) carrying a deleterious  
164 variant found at high frequency in breeds with a Ticked phenotype. Of the 602 differentially expressed  
165 genes at stage 16a, 4 are located in a relatively small domain, ~230 kb, that overlaps with the *Ticked*  
166 linkage interval (Fig. 4b). One of these genes, *Dkk4*, exhibits a pattern of variation and association  
167 consistent with genetic identity as *Ticked*.

168 We surveyed the 99 Lives collection of domestic cat whole genome sequence data<sup>35</sup>, and identified two  
169 nonsynonymous variants in *Dkk4*, p.Ala18Val (felCat9 chrB1:42620835c>t) and p.Cys63Tyr (felCat9  
170 chrB1:42621481g>a), at highly conserved positions (Supplementary Fig. 3) that were present only in  
171 breeds with obscured tabby markings (Abyssinian, n=4; Burmese, n=5; Siamese n=1). The p.Ala18Val  
172 variant is predicted to impair signal peptide cleavage, which normally occurs between residues 18 and



173 19, and the p.Cys63Tyr variant is predicted to disrupt disulfide bonding in a cysteine knot structure  
174 referred to as CRD1<sup>36</sup> (Fig. 4c, Supplementary Fig. 3). These are the only coding alterations predicted  
175 to be deleterious in any of the 4 genes that are differentially expressed in basal keratinocyte  
176 subpopulations (Supplementary Table 6), and are therefore strong candidates for *Ticked*.

177 Association analysis of additional DNA samples across breeds (n=115) and within breeds (n=238)  
178 (Table 1) provides further support that variation in *Dkk4* causes *Ticked* (Table 1, Supplementary Table  
179 7, Supplementary Note 3). All breed cats in which *Ticked* is required (Abyssinian, Singapura) carried  
180 the p.Ala18Val or p.Cys63Tyr *Dkk4* variants, the vast majority as homozygotes or compound  
181 heterozygotes. By contrast, in breeds in which tabby markings are required (Egyptian Mau, Ocicat,  
182 Bengal), none carried a derivative *Dkk4* allele. Lastly, in some breeds (Oriental Longhair, Oriental  
183 Shorthair) and in non-breed cats, either *Ticked* or non-*Ticked* phenotypes are observed, and are  
184 perfectly correlated with the presence or absence of the p.Ala18Val *Dkk4* variant.

185 Haplotype analysis indicates that the p.Ala18Val and p.Cys63Tyr variants occurred on common and  
186 rare haplotypes, respectively (Supplementary Fig. 4a). We identified several small pedigrees where one  
187 or both of the *Dkk4* variants are present (Fig. 4d, Supplementary Fig. 4b, 4c), and observed  
188 segregation patterns consistent with genetic identity of *Dkk4* and *Ticked*. A pedigree of Savannah cats  
189 in which the servaline phenotype cosegregates with the p.Ala18Val variant is of particular interest (Fig.  
190 4d): rather than an apparent suppression of tabby markings as in the Abyssinian and Burmese breeds,  
191 *Ticked* alters the number and size of tabby markings.

192 Unlike *Taqpep*, variation for *Ticked* in California feral cat populations is rare (Extended Data Table 4);  
193 however, one of our fetal skin samples was heterozygous for the p.Ala18Val variant, enabling us to  
194 examine the effect of *Dkk4* on its own expression. As depicted in Fig. 4e, whole mount *in situ*  
195 hybridization of a *Dkk4* probe to fetal skin of  $Ti^{+/+}$  and  $Ti^{+/A18V}$  individuals yields patterns that are  
196 remarkably similar to the adult Savannah and servaline color markings, respectively. Taken together,  
197 these results confirm that the effect of *Ticked* is not to mask dark tabby markings (as it appears to do in  
198 the Abyssinian and Burmese breeds) but to affect pattern establishment such that the regions that  
199 express *Dkk4* in fetal keratinocytes, and the eventual adult markings, become smaller and more  
200 numerous.

## 201 **Discussion**

202 Key elements of reaction-diffusion models as applied to biological pattern are the existence of diffusible  
203 signaling molecules that interact with one another to achieve short-range activation and long-range  
204 inhibition<sup>37</sup>. Our work identifies molecular candidates for this process in establishment of tabby pattern,  
205 suggests that similar mechanisms underlie periodic color patterning and periodic hair follicle spacing,  
206 and provides a genomic framework to explore natural selection for diverse pattern types in wild felids.

207 Development of tabby pattern is different, and arguably simpler, than developmental systems that  
208 involve extensive cell movement or cytoplasmic protrusions, as in zebrafish<sup>13,15,38</sup>. Additionally,  
209 establishment of tabby pattern is completely and remarkably uncoupled from the implementation events  
210 that follow days and weeks later. In particular, epidermal expression of *Dkk4* is dynamic, marking areas  
211 of fetal skin that give rise to hair follicles that later produce dark pigment throughout successive hair  
212 cycles. This implies that *Dkk4*-expressing keratinocytes acquire time-sensitive epigenetic changes that  
213 are later incorporated into hair follicles, and that ultimately determine whether the underlying dermal  
214 papilla releases paracrine agents that darken or lighten the hair.

215 The molecular and the morphologic signatures of tabby pattern establishment recede by stage 17 as  
216 hair follicle placodes start to form. Nonetheless, the two processes share important features. A Wnt-Dkk  
217 reaction-diffusion system has been proposed to underlie hair follicle spacing<sup>12</sup>, and similarity between  
218 the transcriptional profiles described here and those in hair follicle placodes<sup>28</sup> suggests the two  
219 processes could be mediated by similar mechanisms. Previous work on hair follicle spacing involved a  
220 gain-of-function perturbation in which overexpression of *Dkk2* in incipient hair follicles caused both a  
221 reduced number and a clustered distribution of follicles<sup>12</sup>. Our work on *Dkk4* mutations yields reciprocal  
222 results: the p.Ala18Val and p.Cys63Tyr alleles are loss-of-function and, in servaline cats, are  
223 associated with both an increased number and reduced size of dark spots.

224 In domestic cats, the servaline phenotype is one of several examples demonstrating that the effect of  
225 *Dkk4* depends on genetic background and genetic interactions, as exemplified by the different  
226 appearance of the Abyssinian and Burmese breeds, and by interaction of the *Ticked* (*Dkk4*) and *Tabby*  
227 (*Taqpep*) genes<sup>19,39</sup>. The effects of *Taqpep* on visualization of Blotched vs. Mackerel are apparent only  
228 in a non-Ticked background, i.e. *Dkk4* is epistatic to *Taqpep*, which encodes an aminopeptidase whose  
229 physiologic substrates have not been identified<sup>17</sup>. *Taqpep* is expressed in developing skin<sup>17</sup>, and our  
230 observations are consistent with a model in which *Taqpep*-dependent cleavage restricts the range  
231 and/or activity of *Dkk4*, representing a potential new mechanism for modifying Wnt signaling.

232 Variation in *Taqpep* is associated with pattern diversity in the cheetah as well as in the domestic cats<sup>17</sup>,  
233 and the same may be true for *Dkk4*. In fact the servaline pattern was first described in 1839 as  
234 characteristic of a new species, *Felis servalina*, later recognized as a rare morph of the Serval<sup>40</sup>. We  
235 examined *Dkk4* predicted amino acid sequences for 29 felid species including the Serval, and identified  
236 a number of derived variants (Supplementary Fig. 5). Although none of the derived variants represents  
237 an obvious loss-of-function, several are predicted to be moderately deleterious (Supplementary Table  
238 9), and a wider survey of *Dkk4* variation in Servals could reveal additional mutations that explain the  
239 spotting pattern of *Felis servalina*.

240 More broadly, genetic components of the molecular signature we identified for color pattern  
241 establishment are potential substrates for natural selection and evolution of pattern diversity in wild



242 felids and other mammals<sup>41</sup>. For example, complex patterns such as rosettes in the jaguar or complex  
243 spots in the ocelot may represent successive waves of a Wnt-Dkk system, similar to what has been  
244 proposed for hair follicle spacing<sup>12</sup>. Although the action of *Dkk4* in domestic cats appears limited to  
245 color pattern, subtle pleiotropic effects of *Dkk4* inactivation that reduce fitness may not be apparent. If  
246 so, regulatory variation in candidate genes identified here may be substrates for diversifying selection  
247 during felid evolution.

248 Our work exemplifies the potential of companion animal studies to reveal basic insight into  
249 developmental biology, and builds on a history in model organisms such as laboratory mice, in which  
250 coat color variation has been a fruitful platform for studying gene action and interaction. The Ticked,  
251 Tabby, and Blotched phenotypes represent a fraction of the pattern diversity that exists among  
252 domestic cat breeds and interspecific hybrids, which remain a continued resource to explore how spots  
253 and stripes form in nature.

## 254 **Methods**

### 255 Biological samples

256 Embryonic cat tissues were harvested from incidentally pregnant, feral cats at three different spay-  
257 neuter clinics in California. Tissues were processed within 18 hours of the spaying procedure and  
258 embryos were staged based on crown-rump length and anatomic development (Supplementary Table  
259 1)<sup>23</sup>.

260 Genomic DNA for genetic association studies was collected with buccal swabs (Cyto-Pak, Medical  
261 Packaging Corporation) at cat shows or by mail submission from breeders, and extracted using a  
262 QIAamp DNA kit (Qiagen). Feral cat DNA was obtained from gonadal tissue or embryonic tail after  
263 spay/neuter surgeries, as described previously<sup>17</sup>. Genotyping is based on Sanger sequencing of PCR  
264 amplicons for *Dkk4* p.Ala18Val (GAGCTGAGAAGGTCAAGGTGA, GTGGGTTACTTGTGCCATTCC),  
265 *Dkk4* p.Cys63Tyr (CCACTGTGATTTGGCTTCCT, CAGTCCCACAGGGGTTTATG), and *Taqpep*  
266 p.Trp841X (GCCTTCGGAAGTGATGAAGA, ACTTCAGATTCCGCCACAAC).

267 Sample collection and processing was conducted in accordance with a protocol approved by the  
268 Stanford Administrative Panel on Laboratory Animal Care.

### 269 Histology and immunofluorescence

270 Embryonic cat tissues were fixed in 4% paraformaldehyde (Electron Microscopy Sciences). 5  $\mu$ M  
271 paraffin embedded sections were mounted on Superfrost Plus glass slides (Fisher Scientific,  
272 Pittsburgh, PA) and stained with hematoxylin and eosin. Immunofluorescence for Krt5 (Biolegend),  
273 Krt10 (Abcam) and Ki67 (Abcam) was carried out on 5  $\mu$  M sections after antigen retrieval using 0.01  
274 M citrate buffer, pH 6 in a pressure cooker. Krt5-stained sections were incubated with goat anti-rabbit

275 Alexa488 antisera (Jackson ImmunoResearch Laboratories). Krt10 and Ki67 stained sections were  
276 incubated with goat anti-rabbit biotinylated antisera (Jackson ImmunoResearch Laboratories),  
277 Vectastain Elite Avidin-Biotin complex reagent (Vector Labs), and Tyramide-Cy3 amplification reagent  
278 (PerkinElmer). Sections were stained with ProLong antifade reagent with DAPI (Invitrogen). All  
279 photomicrographs are representative of at least three animals at each developmental time point.  
280 Precise genotypes are provided in the text and figures, except in instances where  $Ta^M/Ta^M$  and  $Ta^M/Ta^b$   
281 embryos were used together, which are designated as  $Ta^M/-$ .

### 282 In situ hybridization

283 A 257 bp digoxigenin-labeled RNA probe was generated from a region spanning exons 1-3 of cat *Dkk4*  
284 using a PCR-based template (cDNA from Stage 16 cat embryonic epidermal cells;  
285 CCCTGAGTGTTCTGGTTTT, AATATTGGGGTTGCATCTTCC) and *in vitro* transcription (Roche  
286 Diagnostics). 10  $\mu$  M paraffin-embedded sections were deparaffinized with xylenes and antigen  
287 retrieval using 0.01 M citrate buffer, pH 6 in a pressure cooker was carried out. Sections were treated  
288 with Proteinase K (Sigma), hybridized with 150 ng/ml riboprobe overnight at 60 degrees, and incubated  
289 with anti-digoxigenin antibody conjugated with horseradish peroxidase (Roche Diagnostics) and  
290 Tyramide-Cy3 amplification reagent (PerkinElmer). Sections were stained with ProLong antifade  
291 reagent with DAPI (Invitrogen).

292 Samples for whole mount *in situ* hybridization were treated with Proteinase K (Sigma), neutralized with  
293 2 mg/ml glycine, fixed in 4% paraformaldehyde with 0.1% glutaraldehyde (Electron Microscopy  
294 Sciences), treated with 0.1% sodium borohydride (Sigma), and hybridized with 0.5  $\mu$ g/ml *Dkk4*  
295 riboprobe at 60 degrees overnight. Embryos were subsequently treated with 2% blocking reagent  
296 (Roche Diagnostics) in maleic acid buffer with Tween-20 (MABT), incubated with an alkaline  
297 phosphatase-conjugated anti-digoxigenin antibody (Roche Diagnostics) overnight at 4 degrees, and  
298 developed 3-6 hours in BM Purple (Sigma). Nuclear fast red (Sigma) was used to stain 5 mM sections  
299 in Supplementary Fig. 2.

300 For analysis of *Dkk4* expression in fetal skin of  $Ta^M/Ta^M$  and  $Ta^b/Ta^b$  embryos (Fig. 2D), we quantified  
301 the difference between the two genotypes by counting the number of *Dkk4*-positive regions in 3.6 mm  
302 longitudinal segments of flank epidermis from sections of  $Ta^M/Ta^M$  (n=4 epidermal segments from three  
303 embryos) and  $Ta^b/Ta^b$  (n=3 epidermal segments from two embryos) embryos.

### 304 Tissue preparation for single-cell RNA sequencing

305 A single embryo at each of three development stages (Stage 15a, 15b, and 16a) was used to prepare a  
306 dissociated cell homogenate for single-cell RNA sequencing. Embryos were treated with Dispase  
307 (Stem Cell Technologies) and the epidermis was removed with gentle scraping using a No.15-blade  
308 scalpel. Epidermal sheets were dissociated with trypsin (Gibco) and gentle agitation. Red blood cells

309 were removed with a red blood cell lysis solution (Miltenyi Biotec). Single-cell suspensions were  
310 incubated with a rat anti-CD49f antibody conjugated with phycoerythrin (ThermoFisher Scientific, clone  
311 NKI-GoH3), followed by anti-phycoerythrin magnetic microbeads and enriched using a column-  
312 magnetic separation procedure (Miltenyi Biotec).  $10^6$  fetal skin cells were processed for each single-cell  
313 RNA sequencing library.

#### 314 Single-cell RNAseq

315 3' single-cell barcoding and library preparation were performed using 10x Genomics single-cell RNA  
316 sequencing platform (10x Genomics). Libraries were constructed with version 2 (stage 16a) or version  
317 3 (stage15 a/b) chemistry and sequenced on a single HiSeqX (Illumina) lane to generate 400-450  
318 million paired-end 150 bp reads (Supplementary Table 4).

319 Barcoded reads were aligned to the domestic cat genome assembly (felCat9, NCBI Felis catus  
320 Annotation Release 104) using the 10x Genomics Cell Ranger (v3.1) software. Annotations for 3'  
321 untranslated regions were extended by 2 kb for all transcripts except when an extension overlapped a  
322 neighboring gene. The 'cellranger count' pipeline was used to output feature-barcode matrices,  
323 secondary analysis data, and browser visualization files. The 'cellranger reanalyze' function was used  
324 to exclude 247 cell cycle genes and *XIST* to minimize cell-cycle and sex associated variation in  
325 downstream analysis.

326 *k*-means clustering performed by the 'cellranger count' pipeline on the stage 16a data set was used to  
327 delineate cell populations (Supplementary Note 2), progressively increasing *k* until the basal  
328 keratinocyte population was split into distinct groups (at *k*=9). Differential expression analysis between  
329 cell populations defined by clustering was measured using Cell Ranger's implementation of sSeq<sup>42</sup>,  
330 which employs a negative binomial exact test.

331 For stages 15a and 15b, the 'cellranger aggr' function was used to aggregate expression matrices from  
332 each stage. Aggregation resulted in co-clustering of stage15a (n=59) and 15b (n=774) *Dkk4*-positive  
333 cell populations in UMAP projections that failed to cluster at stage 15a when expression matrixes were  
334 analyzed independently. Differential expression analysis between high and low expressing *Dkk4*  
335 populations was measured using Cell Ranger's implementation of sSeq, as described above.

336 Genomic coordinates for the 604 genes differentially expressed at stage 16a were determined using  
337 the felCat9 genome assembly feature table file ([www.ncbi.nlm.nih.gov/assembly/GCF\\_000181335.3/](http://www.ncbi.nlm.nih.gov/assembly/GCF_000181335.3/)).  
338 Functional annotation was performed using Panther ([pantherdb.org](http://pantherdb.org)) and DAVID ([david.ncifcrf.gov](http://david.ncifcrf.gov))  
339 annotation tools.

#### 340 Ticked genetic analysis

341 Whole genome sequence data from 57 cats in the 99 Lives dataset were used for variant detection.  
342 Variant calling and annotation (NCBI Felis catus Annotation Release 103) were performed with  
343 Platypus<sup>43</sup> and SNPeff<sup>44</sup>, respectively, after alignment to the domestic cat genome (felCat8) with BWA.  
344 SNPsift was used to identify protein coding variants in *Vdac3*, *Polb*, *Dkk4*, and *Plat*.  
345 Beagle<sup>45</sup> v4.1 was used to infer haplotypes across a 15 Mbp interval from chrB1:30,000,000-  
346 45,000,000 (felCat8). Phased SNPs were thinned to 1 site/5 kb with VCFtools and converted to felCat9  
347 assembly coordinates with the UCSC LiftOver tool. The color coding for reference (blue) and alternate  
348 (yellow) alleles (Supplemental Fig. 4a) reflect the felCat8 assembly, but the genomic coordinates  
349 presented are converted to the felCat9 assembly.  
350 Combined annotation dependent depletion<sup>46</sup> (CADD, v1.4) was used to score the deleteriousness of  
351 coding variants within *Dkk4*, after converting to orthologous positions in the human genome  
352 (GRCh38/Hg38). SignalP-5.0 was used to predict signal peptide cleavage for the p.Ala18Val variant,  
353 and the PyMol browser (v2.3.3) was used to visualize and display the protein structure of the CRD1  
354 domain of *Dkk4* (Fig. 4c), using the N-terminal region solution structure of recombinant human *Dkk4*  
355 protein<sup>36</sup> (5O57, Protein Data Bank).

#### 356 **Data availability**

357 Raw and processed single-cell RNAseq datasets have been deposited in GEO (accession number:  
358 [GSE152946](https://www.ncbi.nlm.nih.gov/geo/query/acc.cgi?acc=GSE152946)). GEO files include unfiltered feature-barcode matrices in HDF5 format, output by the  
359 CellRanger pipeline, and Illumina fastq files for stage 15a, 15b, and 16a single-cell RNAseq.

360

361 **References**

- 362 1. Allen, W. L., Cuthill, I. C., Scott-Samuel, N. E. & Baddeley, R. Why the leopard got its spots:  
363 relating pattern development to ecology in felids. *Proceedings of the Royal Society B: Biological*  
364 *Sciences* **278**, 1373-1380 (2011).
- 365 2. Jonathan, B. L. B. A unity underlying the different zebra striping patterns. *Journal of Zoology*  
366 (1977).
- 367 3. Kondo, S. An updated kernel-based Turing model for studying the mechanisms of biological  
368 pattern formation. *J Theor Biol* **414**, 120-127 (2017).
- 369 4. Turing, A. M. The chemical basis of morphogenesis. *Philosophical Transactions of the Royal*  
370 *Society of London, Series B* **237**, 37-72 (1952).
- 371 5. Cohen, M., Georgiou, M., Stevenson, N. L., Miodownik, M. & Baum, B. Dynamic Filopodia  
372 Transmit Intermittent Delta-Notch Signaling to Drive Pattern Refinement during Lateral Inhibition.  
373 *Developmental Cell* **19**, 78-89 (2010).
- 374 6. Economou, A. D. et al. Periodic stripe formation by a Turing mechanism operating at growth  
375 zones in the mammalian palate. *Nature Genetics* **44**, 348-351 (2012).
- 376 7. Glover, J. D. et al. Hierarchical patterning modes orchestrate hair follicle morphogenesis. *PLOS*  
377 *Biology* **15**, e2002117 (2017).
- 378 8. Ho, W. K. et al. Feather arrays are patterned by interacting signalling and cell density waves.  
379 (2019).
- 380 9. Jiang, T. X., Jung, H. S., Widelitz, R. B. & Chuong, C. M. Self-organization of periodic patterns by  
381 dissociated feather mesenchymal cells and the regulation of size, number and spacing of  
382 primordia. *Development* **126**, (1999).
- 383 10. Miura, T., Shiota, K., Morriss-Kay, G. & Maini, P. K. Mixed-mode pattern in Doublefoot mutant  
384 mouse limb—Turing reaction–diffusion model on a growing domain during limb development.  
385 *Journal of Theoretical Biology* **240**, 562-573 (2006).
- 386 11. Pourquié, O. The Segmentation Clock: Converting Embryonic Time into Spatial Pattern. *Science*  
387 **301**, 328-330 (2003).
- 388 12. Sick, S., Reinker, S., Timmer, J. & Schlake, T. WNT and DKK Determine Hair Follicle Spacing  
389 Through a Reaction-Diffusion Mechanism. *Science* **314**, (2006).
- 390 13. Patterson, L. B. & Parichy, D. M. Zebrafish Pigment Pattern Formation: Insights into the  
391 Development and Evolution of Adult Form. *Annual Review of Genetics* **53**, 505-530 (2019).
- 392 14. Singh, A. & Nüsslein-Volhard, C. Zebrafish Stripes as a Model for Vertebrate Colour Pattern  
393 Formation. *Current Biology* **25**, R81-R92 (2015).
- 394 15. Watanabe, M. & Kondo, S. Is pigment patterning in fish skin determined by the Turing  
395 mechanism. *Trends in Genetics* **31**, 88-96 (2015).

- 396 16. Jordan, S. A. & Jackson, I. J. Melanocortin receptors and antagonists regulate pigmentation and  
397 body weight. *Bioessays* **20**, 603-606 (1998).
- 398 17. Kaelin, C. B. et al. Specifying and sustaining pigmentation patterns in domestic and wild cats.  
399 *Science (New York, N.Y.)* **337**, 1536-1541 (2012).
- 400 18. Millar, S. E., Miller, M. W., Stevens, M. E. & Barsh, G. S. Expression and transgenic studies of the  
401 mouse agouti gene provide insight into the mechanisms by which mammalian coat color patterns  
402 are generated. *Development* **121**, 3223-3232 (1995).
- 403 19. Eizirik, E. et al. Defining and Mapping Mammalian Coat Pattern Genes: Multiple Genomic  
404 Regions Implicated in Domestic Cat Stripes and Spots. *Genetics* **184**, 267-275 (2010).
- 405 20. Buckley, R. M. et al. A new domestic cat genome assembly based on long sequence reads  
406 empowers feline genomic medicine and identifies a novel gene for dwarfism. *bioRxiv*  
407 2020.01.06.896258 (2020).
- 408 21. Pontius, J. U. et al. Initial sequence and comparative analysis of the cat genome. *Genome*  
409 *research* **17**, 1675-1689 (2007).
- 410 22. Levy, J. K., Gale, D. W. & Gale, L. A. Evaluation of the effect of a long-term trap-neuter-return and  
411 adoption program on a free-roaming cat population. *Journal of the American Veterinary Medical*  
412 *Association* **222**, 42-46 (2003).
- 413 23. Knospe, C. Periods and Stages of the Prenatal Development of the Domestic Cat. *Anatomia,*  
414 *Histologia, Embryologia: Journal of Veterinary Medicine Series C* **31**, 37-51 (2002).
- 415 24. Kaufman, M. H. *The Atlas of Mouse Development* (Academic Press, 1992).
- 416 25. Searle, A. G. Gene frequencies in London's cats. *Journal of Genetics* **49**, 214-220 (1949).
- 417 26. Becht, E. et al. Dimensionality reduction for visualizing single-cell data using UMAP. *Nature*  
418 *Biotechnology* **37**, 38-44 (2019).
- 419 27. Fuchs, E. & Green, H. Changes in keratin gene expression during terminal differentiation of the  
420 keratinocyte. *Cell* **19**, 1033-1042 (1980).
- 421 28. Tomann, P., Paus, R., Millar, S. E., Scheidereit, C. & Schmidt-Ullrich, R. Lhx2 is a direct NF- $\kappa$ B  
422 target gene that promotes primary hair follicle placode down-growth. (2016).
- 423 29. Zhang, Y. et al. Activation of  $\beta$ -catenin signaling programs embryonic epidermis to hair follicle  
424 fate. *Development* **135**, (2008).
- 425 30. Reddy, S. et al. Characterization of Wnt gene expression in developing and postnatal hair follicles  
426 and identification of Wnt5a as a target of Sonic hedgehog in hair follicle morphogenesis. *Mech*  
427 *Dev* **107**, 69-82 (2001).
- 428 31. Whiting, P. W. Inheritance of coat-color in cats. *Journal of Experimental Zoology* **25**, 539-569  
429 (1918).
- 430 32. Kaelin, C. B. & Barsh, G. S. Genetics of Pigmentation in Dogs and Cats. *Annual Review of Animal*  
431 *Biosciences* **1**, 125-156 (2013).



- 432 33. Lomax, D. & Robinson, R. Tabby Pattern Alleles of the Domestic Cat. *J Hered* **79**, 21-23 (1988).
- 433 34. Lyons, L. A. et al. The Tabby cat locus maps to feline chromosome B1. *Animal Genetics* **37**, 383-  
434 386 (2006).
- 435 35. Lyons, L. A. et al. Whole genome sequencing in cats, identifies new models for blindness in  
436 AIPL1 and somite segmentation in HES7. *BMC Genomics* **17**, 265 (2016).
- 437 36. Patel, S. et al. Structural and functional analysis of Dickkopf 4 (Dkk4): New insights into Dkk  
438 evolution and regulation of Wnt signaling by Dkk and Kremen proteins. *J Biol Chem* **293**, 12149-  
439 12166 (2018).
- 440 37. Meinhardt, H. & Gierer, A. Pattern formation by local self-activation and lateral inhibition.  
441 *Bioessays* **22**, 753-760 (2000).
- 442 38. Eom, D. S., Bain, E. J., Patterson, L. B., Grout, M. E. & Parichy, D. M. Long-distance  
443 communication by specialized cellular projections during pigment pattern development and  
444 evolution. *eLife* **4**, (2015).
- 445 39. Kaelin, C. & Barsh, G. Tabby pattern genetics - a whole new breed of cat. *Pigment Cell &*  
446 *Melanoma Research* **23**, 514-516 (2010).
- 447 40. Ogilby, W. *Felis servalina*. *Proceedings of the Zoological Society of London* **7**, 94 (1839).
- 448 41. Figueiró, H. V. et al. Genome-wide signatures of complex introgression and adaptive evolution in  
449 the big cats. *Science Advances* **3**, e1700299 (2017).
- 450 42. Yu, D., Huber, W. & Vitek, O. Shrinkage estimation of dispersion in Negative Binomial models for  
451 RNA-seq experiments with small sample size. *Bioinformatics* **29**, 1275-1282 (2013).
- 452 43. Rimmer, A. et al. Integrating mapping-, assembly- and haplotype-based approaches for calling  
453 variants in clinical sequencing applications. *Nat Genet* **46**, 912-918 (2014).
- 454 44. Cingolani, P. et al. A program for annotating and predicting the effects of single nucleotide  
455 polymorphisms, SnpEff: SNPs in the genome of *Drosophila melanogaster* strain w1118; iso-2; iso-  
456 3. *Fly (Austin)* **6**, 80-92 (2012).
- 457 45. Browning, S. R. & Browning, B. L. Rapid and accurate haplotype phasing and missing-data  
458 inference for whole-genome association studies by use of localized haplotype clustering. *Am J*  
459 *Hum Genet* **81**, 1084-1097 (2007).
- 460 46. Kircher, M. et al. A general framework for estimating the relative pathogenicity of human genetic  
461 variants. *Nat Genet* **46**, 310-315 (2014).
- 462

463 **Acknowledgments**

464 The authors thank Hermogenes Manuel for technical assistance, Anthony Hutcherson and other  
465 members of The International Cat Association and Cat Fancy Association for assistance with breed  
466 sample collection, Trap-Neuter-Release programs in California for assistance with feral sample  
467 collection, Valerie Smith, Adriana Kajon, and Gulnaz Sharifzyanova for providing material from OSH,  
468 Singapura, and Savannah pedigrees, respectively, Helmi Flick and Jamila Agaeva for domestic and  
469 Savannah cat photographs, respectively. This research has been supported in part by the  
470 HudsonAlpha Institute for Biotechnology, and by a grant from the National Institutes of Health to G.S.B  
471 (AR-067925).

472 **Authors contributions**

473 C.B.K., K.A.M., and G.S.B. conceived the project, designed experiments, and wrote the paper. C.B.K.,  
474 and K.A.M. performed experiments and analyzed data; G.S.B. procured funding.

475 **Competing interests**

476 The authors have no competing interests.

477

478 **Table 1. *Dkk4* genotypes in Ticked and non-Ticked cats**

479

| Breed and phenotype       | <i>Dkk4</i> <sup>+/+</sup> | <i>Dkk4</i> <sup>+/-</sup> | <i>Dkk4</i> <sup>-/-</sup> | Total |
|---------------------------|----------------------------|----------------------------|----------------------------|-------|
| Abyssinian (Ticked)       | 0                          | 1                          | 36                         | 37    |
| Singapura (Ticked)        | 0                          | 2                          | 24                         | 26    |
| Burmese (Ticked)          | 1                          | 1                          | 11                         | 13    |
| Subtotal                  | 1                          | 4                          | 71                         | 76    |
| Egyptian Mau (non-Ticked) | 8                          | 0                          | 0                          | 8     |
| Ocicat (non-Ticked)       | 11                         | 0                          | 0                          | 11    |
| Bengal (non-Ticked)       | 10                         | 0                          | 0                          | 10    |
| Subtotal                  | 29                         | 0                          | 0                          | 29    |
| OSH and OLH Ticked        | 0                          | 23                         | 2                          | 25    |
| Non-breed cats Ticked     | 0                          | 4                          | 0                          | 4     |
| Subtotal                  | 0                          | 27                         | 2                          | 29    |
| OSH and OLH non-Ticked    | 21                         | 0                          | 0                          | 21    |
| Non-breed cats non-Ticked | 188                        | 0                          | 0                          | 188   |
| Subtotal                  | 209                        | 0                          | 0                          | 209   |

480

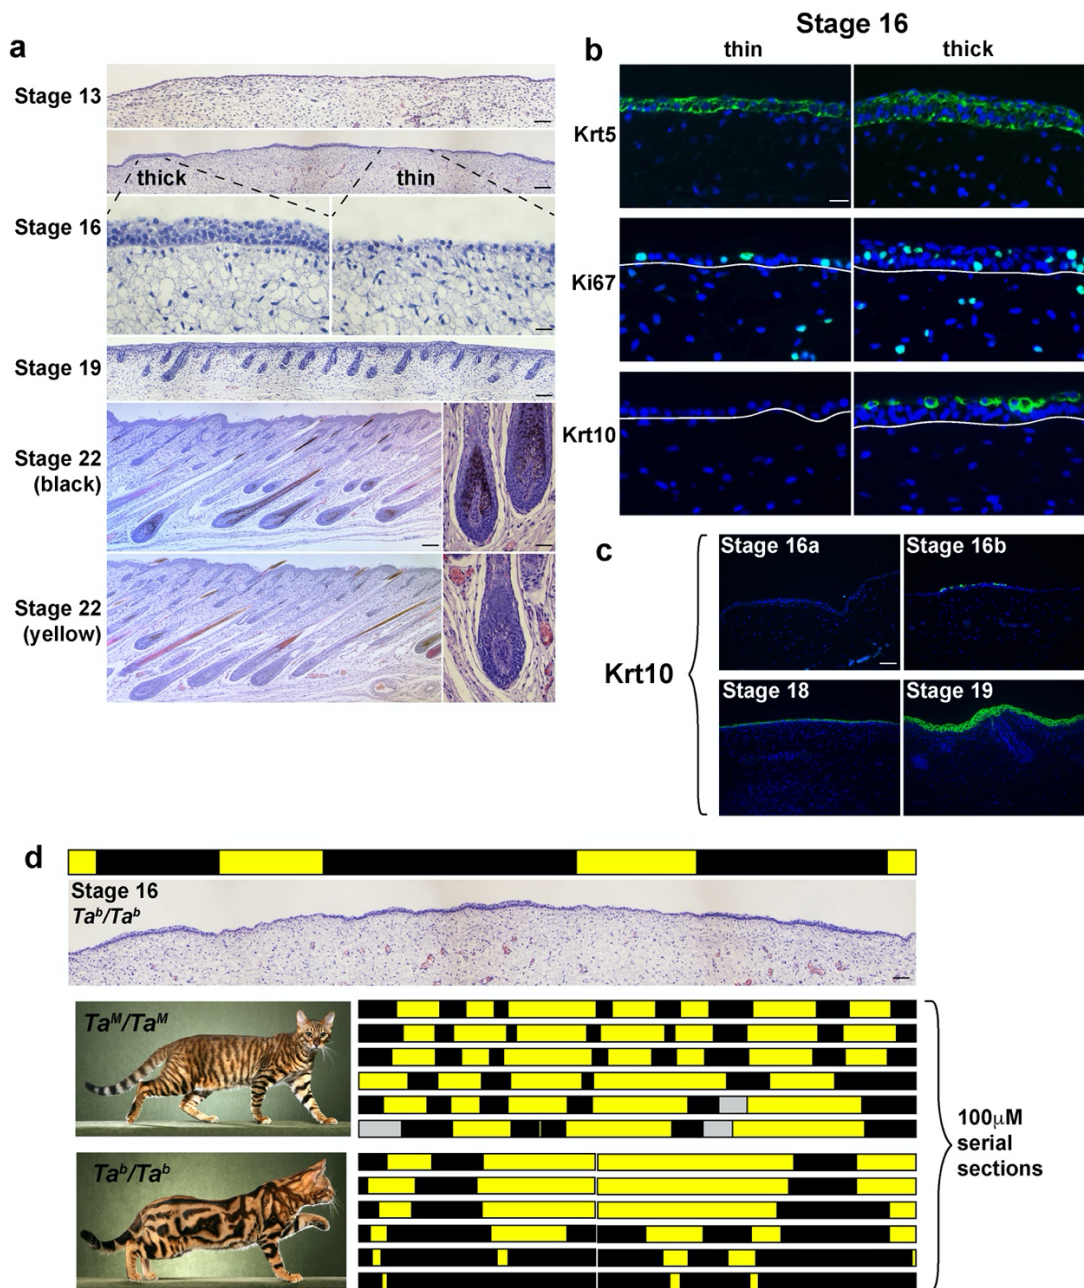

481

482 **Fig 1: Patterns of epidermal thickening in fetal cat skin.** **a**, Cat skin histology at different  
 483 developmental stages (stage 16, bottom panels – high power fields of thick and thin epidermis; stage  
 484 22, right panels – high power fields of black and yellow follicles). **b**, Immunofluorescence for Krt5, Ki67  
 485 and Krt10 (green) in stage 16 skin sections (DAPI, blue; white lines mark dermal-epidermal  
 486 junction). **c**, Krt10 immunofluorescence (green) on cat skin at different developmental stages  
 487 (DAPI, blue). **d**, Topological maps based on skin histology (thin, yellow; thick, black) from  $Ta^M/Ta^M$  and  
 488  $Ta^b/Ta^b$  stage 16 embryos mimic pigmentation patterns observed in adult animals (left panels; gray bar  
 489 - no data). Scale bars: **a**, stage 13 50 µM; stage 16 (top), Stage 19, stage 22 (left) 100 µM; stage 16  
 490 (bottom), stage 22 (right) 25 µM; **b**, 25 µM; **c**, **d** 50 µM.

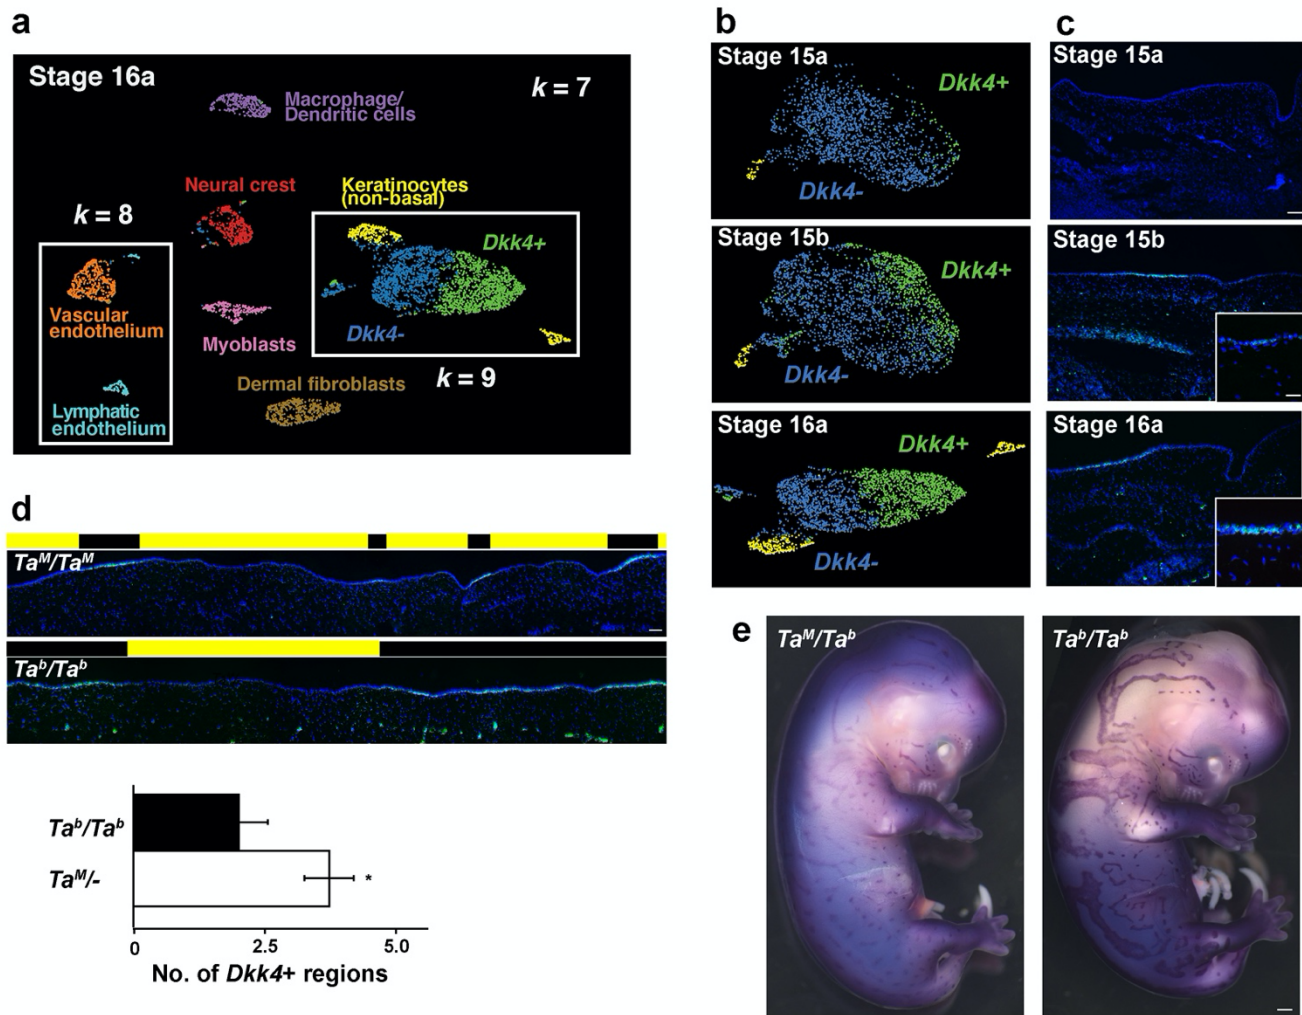

491

492 **Fig. 2: Pattern of gene expression in fetal cat skin determined by single-cell RNA sequencing**  
 493 **and *in situ* hybridization.** **a**, UMAP visualization of stage 16a cell populations colored by  $k$ -means  
 494 clustering. Keratinocytes cluster as non-basal (yellow) and basal populations at  $k=7$ , with the latter split  
 495 into subpopulations distinguished by high (green) and low (blue)  $Dkk4$  expression at  $k=9$ .  
 496 Subpopulations of endothelium appear at  $k=8$  (orange, cyan). **b**, Supervised (top and middle panels;  
 497 stage 15a and 15b) and  $k$ -means (bottom panel, stage 16a) clustering at sequential developmental  
 498 stages delineate a non-basal (yellow) and two basal keratinocyte populations,  $Dkk4$ -positive (green)  
 499 and  $Dkk4$ -negative (blue). **c**,  $Dkk4$  expression (green) in fetal cat skin at corresponding stages (DAPI,  
 500 blue; high power image, inset). **d**,  $Dkk4$  expression (green) in sections of stage 16  
 501  $Ta^M/Ta^M$  and  $Ta^b/Ta^b$  embryonic cat skin (DAPI, blue). Black and yellow blocks mark thick and  
 502 thin regions, respectively. Number of  $Dkk4$ -positive regions (mean $\pm$ sem) in 3.6mm of Stage  
 503 16  $Ta^M/Ta^M$  and  $Ta^b/Ta^b$  embryonic cat skin from sections ( $n = 3-4$  regions from at least two animals of  
 504 each genotype; two-tail t-test). **e**,  $Dkk4$  expression (purple) in stage 16  $Ta^M/Ta^b$  and  $Ta^b/Ta^b$  cat  
 505 embryos. Scale bars: c, 50  $\mu$ M; c inset, 25  $\mu$ M; d, 50  $\mu$ M; e, 1 mm.



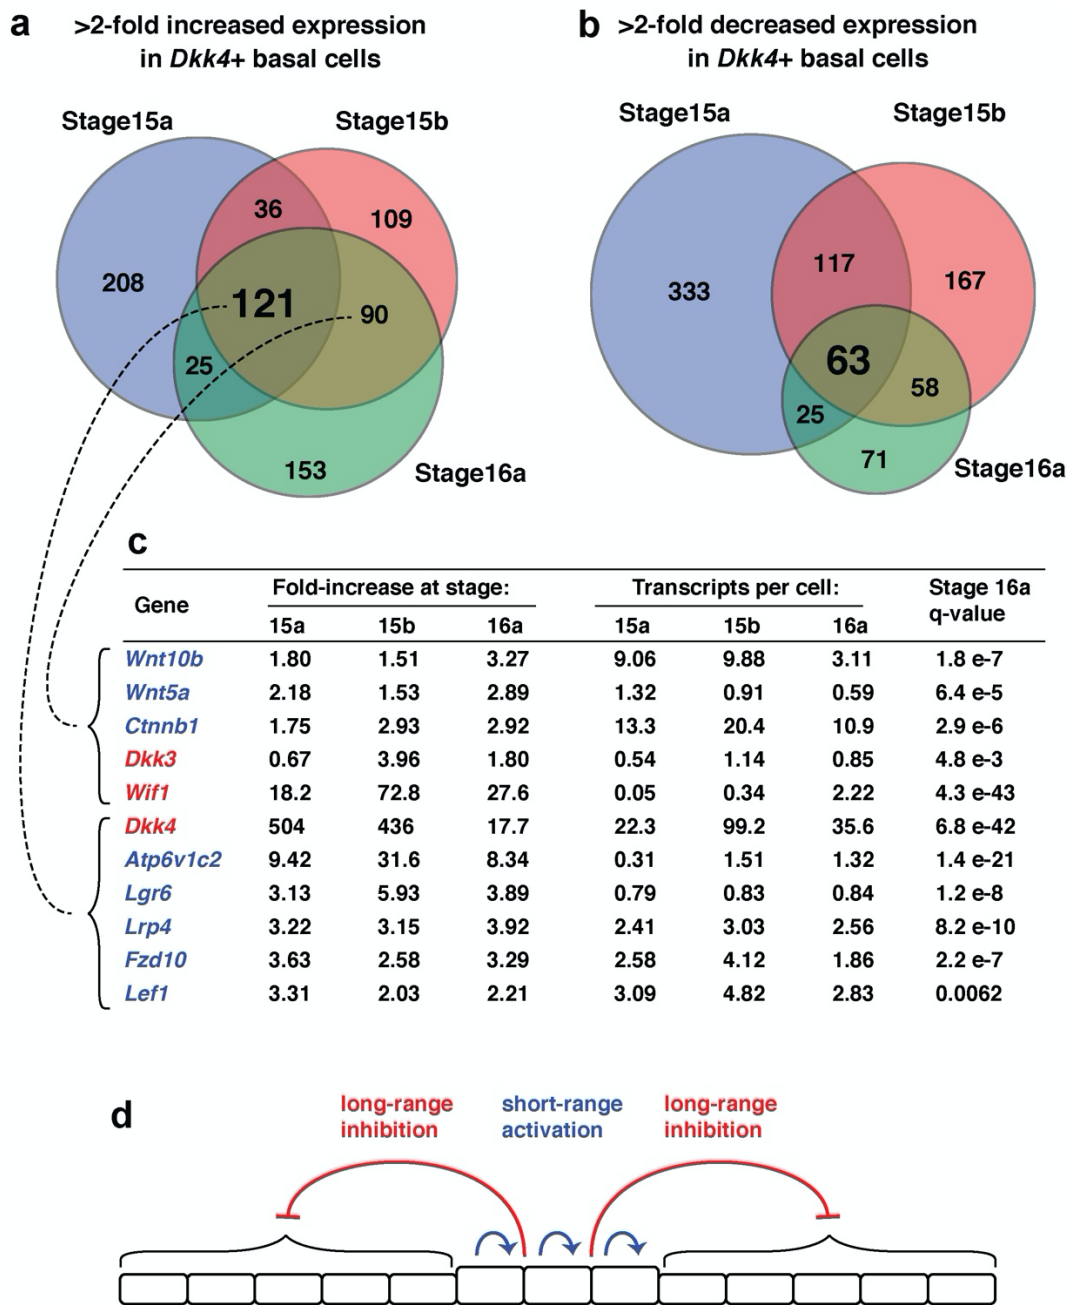

506

507 **Fig. 3. Single-cell RNA sequencing at successive stages of fetal skin development implicates**  
 508 **WNT signaling-based reaction-diffusion in color pattern establishment.** Overlap of gene  
 509 expression profiles for genes with >2-fold increased (a) or decreased (b) expression in *Dkk4*-positive  
 510 basal keratinocytes at stages 15a (blue), 15b (red), and 16a (green). (c) Gene expression metrics for  
 511 WNT signaling genes with elevated expression in *Dkk4*-positive basal keratinocytes; q-values indicate  
 512 the significance of differential expression between basal keratinocyte subpopulations at stage 16a  
 513 (negative binomial exact test). Genes are colored according to their predicted role in either short-range  
 514 activation (blue) or long-range inhibition (red) of WNT signaling in thick and thin epidermis, respectively,  
 515 as presented in a model for color pattern establishment (d).



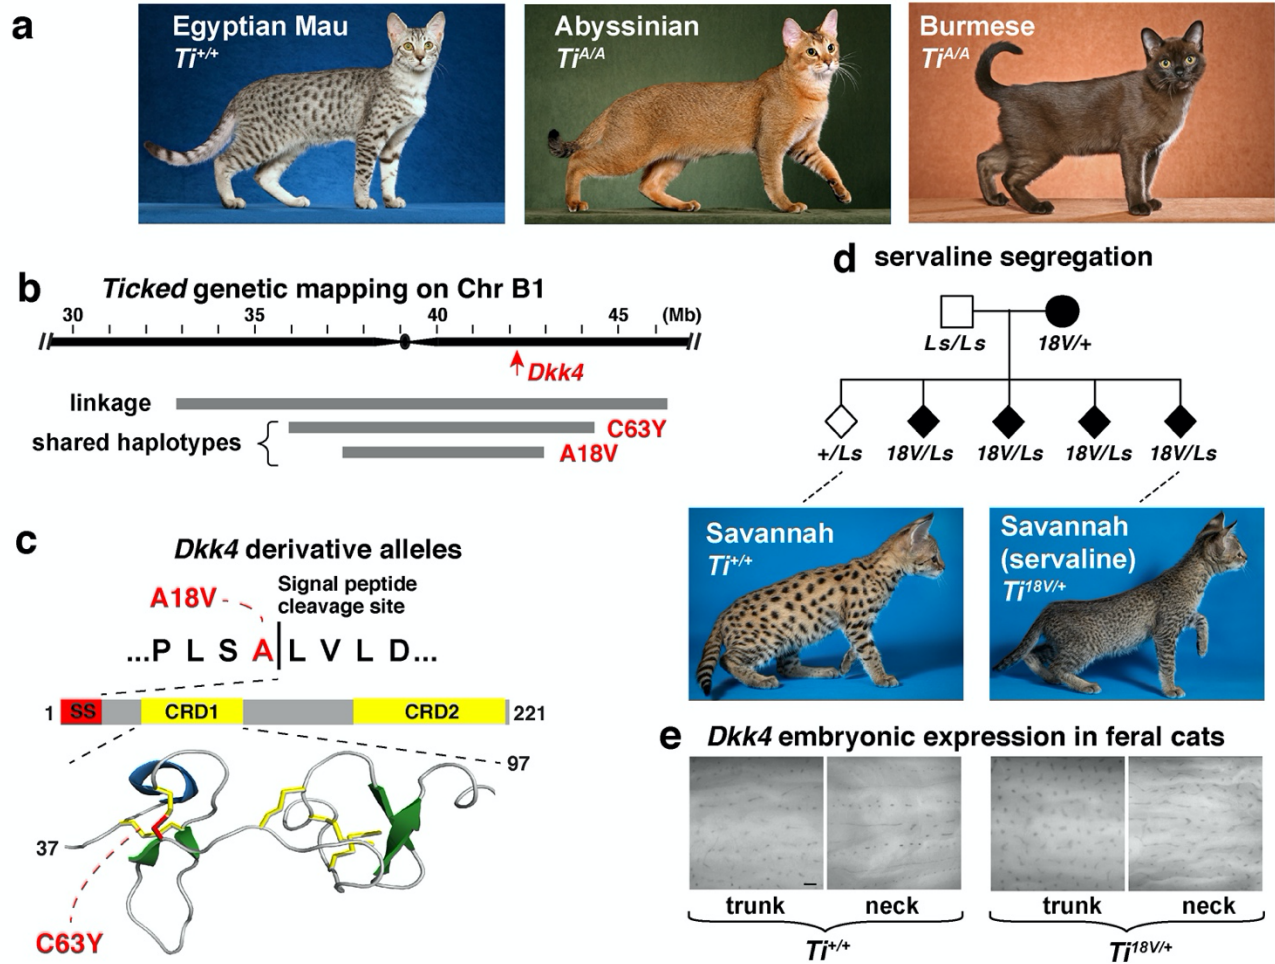

516

517 **Fig. 4: *Dkk4* mutations alter *Dkk4* expression patterns in fetal skin and coat color patterns**  
 518 **in adult cats.** **a**, Cat breeds selected for Spotted (Egyptian Mau) or for Ticked (Abyssinian and  
 519 Burmese) color patterns. **b**, Ticked genetic interval delineated by linkage<sup>19</sup> or shared haplotypes among  
 520 cats with *Dkk4* mutations. Coordinates are based on the felCat9 assembly. **c**, *Dkk4* coding mutations  
 521 (red) at the signal peptide cleavage site (p.Ala18Val) or a cysteine residue (p.Cys63Tyr) involved in  
 522 disulfide bridge and cysteine knot formation within cysteine rich domain 1 (CRD1). **d**, Cosegregation of  
 523 *Dkk4* p.Ala18V and the servaline color pattern in Savannah cats. **e**, Altered *Dkk4* expression (dark  
 524 markings) in whole mount preparations from stage 17 fetal skin. Scale bar in e, 300  $\mu$ M.

525

526 **Supplementary materials**

- 527 Supplementary Note 1: Embryonic staging and characterization of epidermal morphology.
- 528 Supplementary Note 2: Single-cell gene expression experiments and analyses.
- 529 Supplementary Note 3: Genetic evaluation of *Ticked*.
- 530 Supplementary Fig. 1. Topological maps of dorsal neck skin from Stage 16.
- 531 Supplementary Fig. 2. *Dkk4* expression in embryonic cat skin.
- 532 Supplementary Fig. 3. Evolutionary constraint and functional prediction for cat *Dkk4* variants associated  
533 with *Ticked*.
- 534 Supplementary Fig. 4. *Dkk4* variants occur on extended haplotypes and co-segregate with *Ticked* in  
535 pedigrees.
- 536 Supplementary Fig. 5. Protein alignment of predicted *Dkk4* protein sequence from 29 felid species
- 537 Supplementary Table 1. Stages of embryonic and fetal development in the domestic cat.
- 538 Supplementary Table 2. Histologic and molecular features of thick epidermal domains in cat as  
539 compared to developing hair follicle placodes and “normal” epidermal differentiation.
- 540 Supplementary Table 3. Gene markers used for identification of UMAP clusters
- 541 Supplementary Table 4. scRNAseq summary statistics
- 542 Supplementary Table 5. List of differentially expressed genes from scRNAseq and overlap with hair  
543 follicle placode (separate spreadsheet).
- 544 Supplementary Table 6. *Dkk4* coding variants detected in 57 cats.
- 545 Supplementary Table 7. *Dkk4* alleles categorized according to breed and phenotype.
- 546 Supplementary Table 8. Basal keratinocyte subpopulation cell number at different *Dkk4* expression  
547 thresholds.
- 548 Supplementary Table 9. *Dkk4* variants and predicted impact (CADD) in the Felidae.
- 549
